# Supplementary material for: Early Change in FDG-PET Signal and Plasma Cell-Free DNA Level Predicts Erlotinib Response in EGFR Wild-Type NSCLC Patients
Source: PubMed Central journal article supplement — Transl Oncol. 2016 Oct 29;9(6):505–11. doi: 10.1016/j.tranon.2016.09.003 (PMC5094375; doi:10.1016/j.tranon.2016.09.003), 2016-10-29
Supplement: mmc4.pdf [file mmc4.pdf]

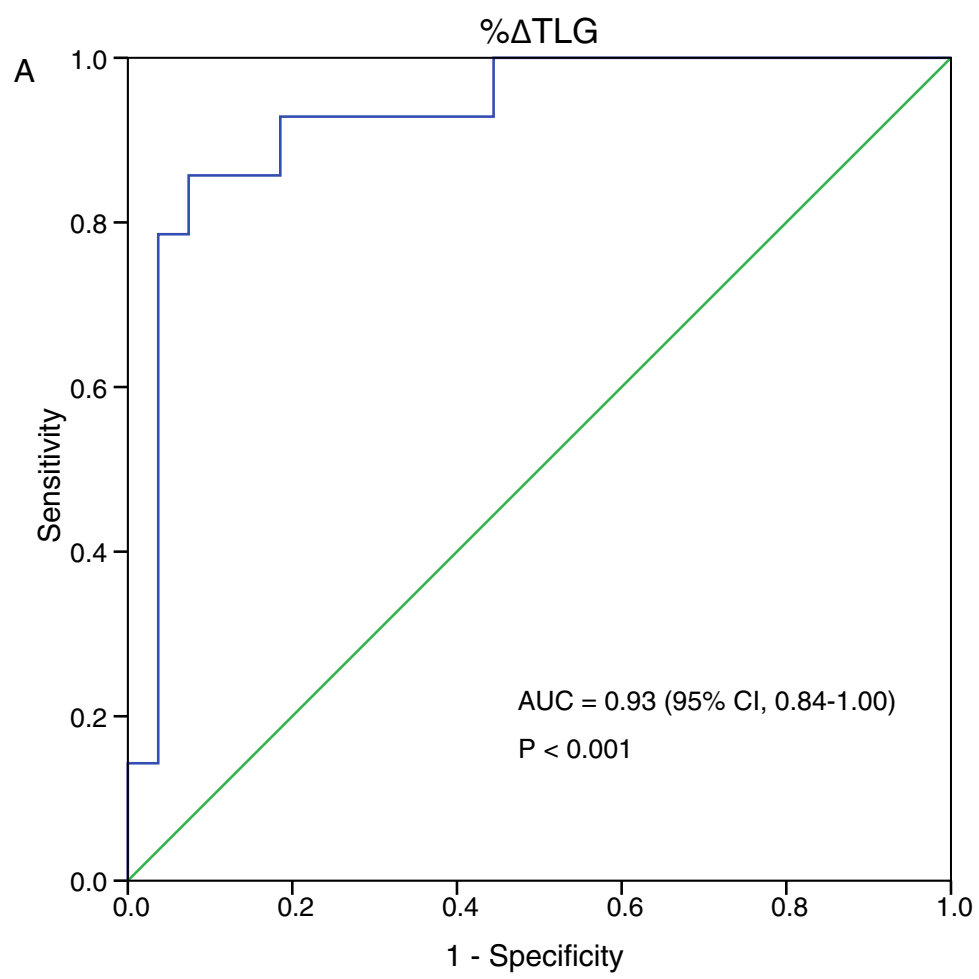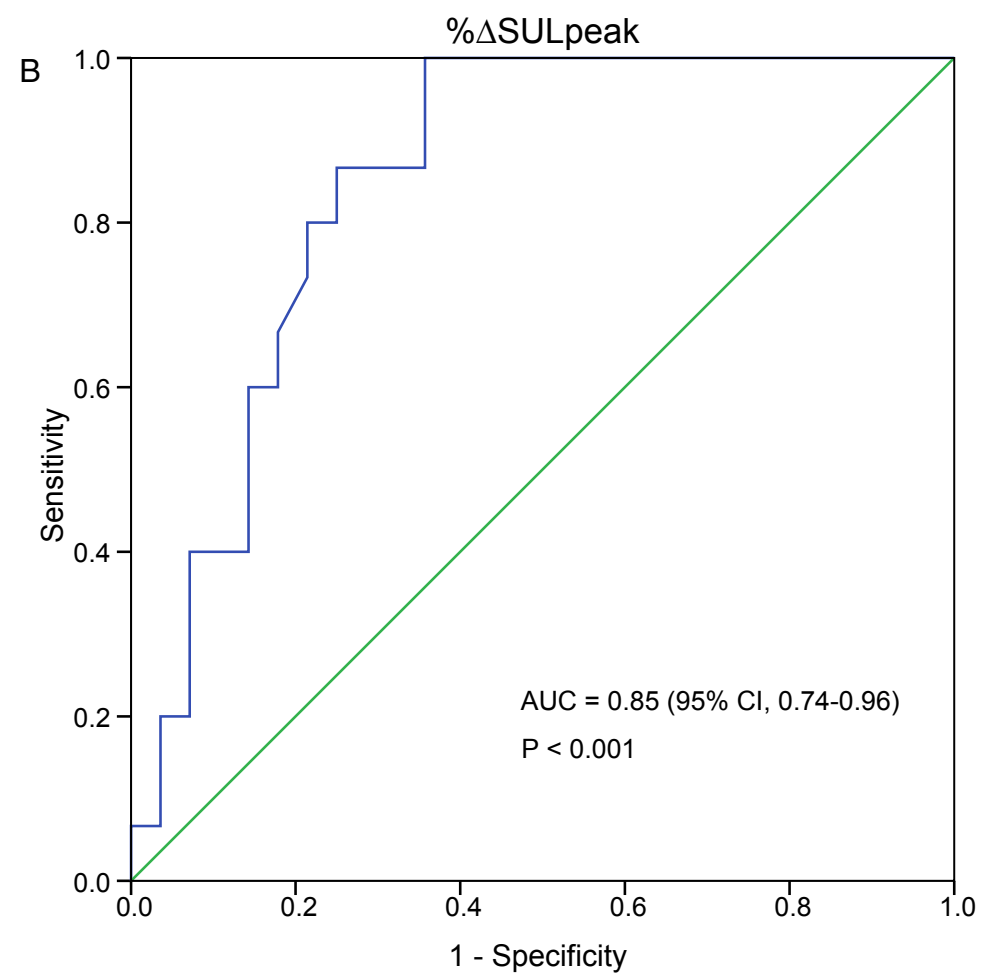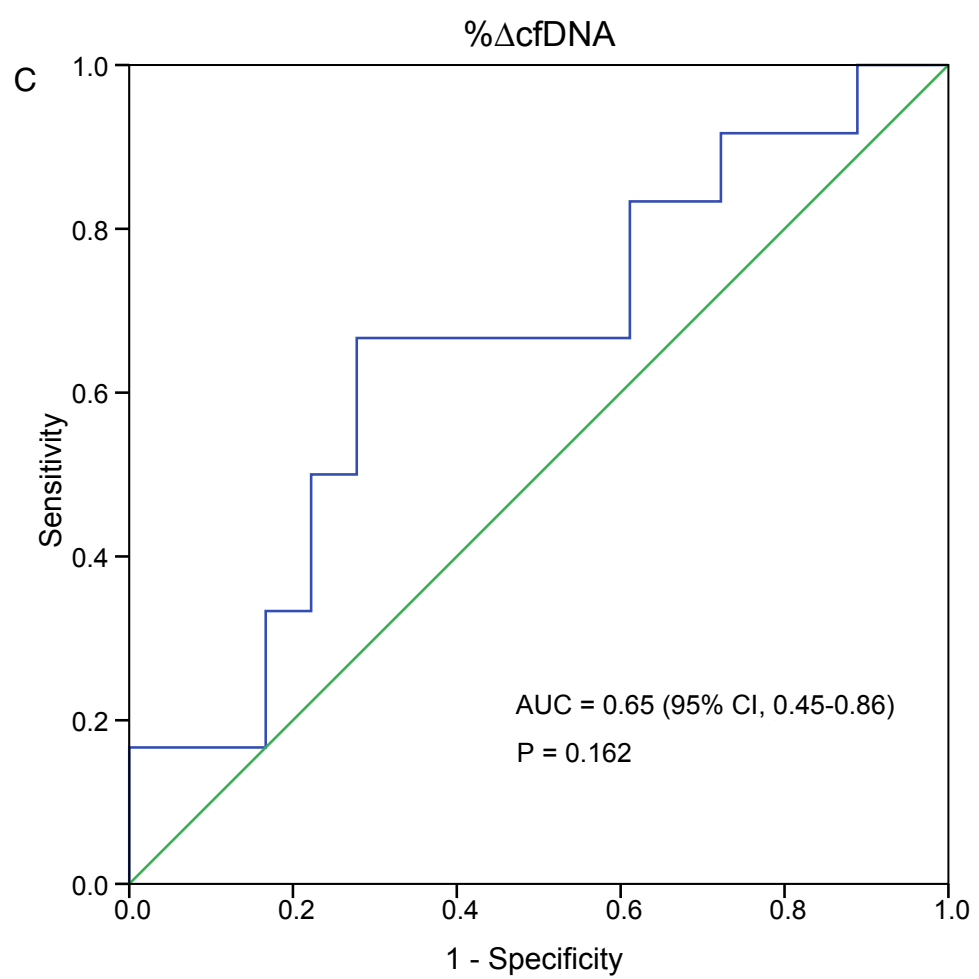

Supplementary Figure 1. Receiver operating characteristic (ROC) curve analysis performed to predict the accuracy of PET parameters and cfDNA with respect to non-progression on the CT scan. (A): ROC curve for  $\% \Delta \text{TLG}$  (B) ROC curve for  $\% \Delta \text{SULpeak}$  (C): ROC curve for  $\% \Delta \text{SULpeak}$ . AUC, area under the ROC curve; CI, confidence interval.
