# Supplementary material for: Early Change in FDG-PET Signal and Plasma Cell-Free DNA Level Predicts Erlotinib Response in EGFR Wild-Type NSCLC Patients
Source: PubMed Central journal article supplement — Transl Oncol. 2016 Oct 29;9(6):505–11. doi: 10.1016/j.tranon.2016.09.003 (PMC5094375; doi:10.1016/j.tranon.2016.09.003), 2016-10-29
Supplement: mmc5.pdf [file mmc5.pdf]

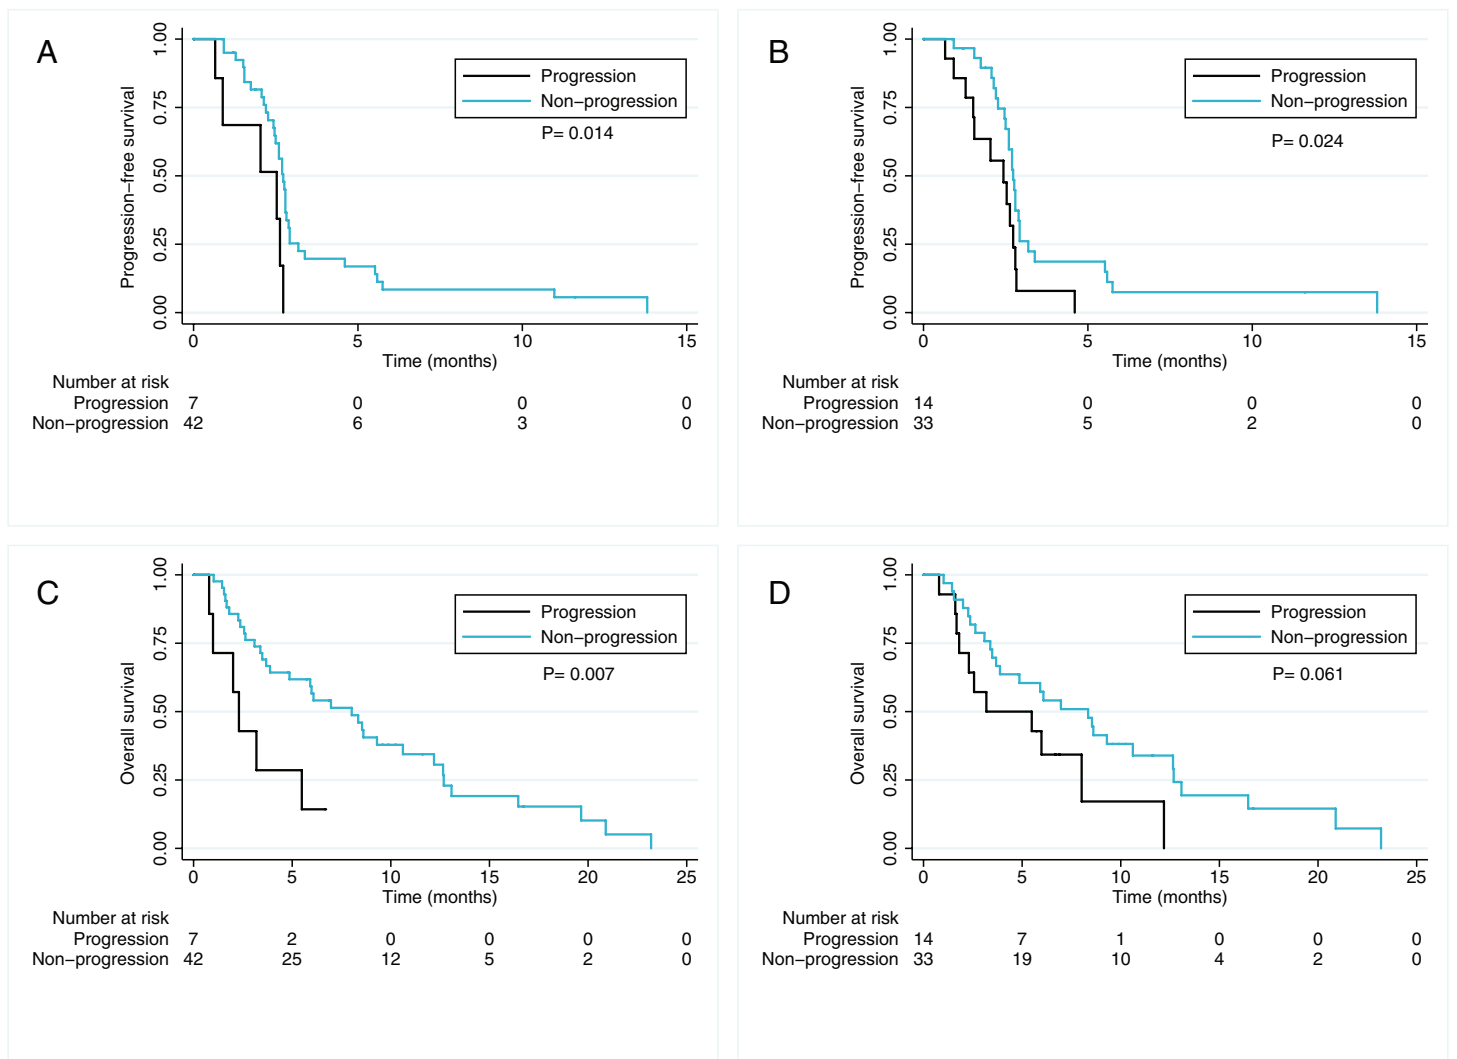

Supplementary Figure 2. Kaplan-Meier curves for progression-free survival (PFS) (A and B) and overall survival (OS) (C and D) according to early PET response assessed with SULpeak and TLG. (A): SULpeak assessment; median PFS of patients classified with progression 2.5 months (95% confidence interval (CI): 0.7-4.4) and non-progression 2.7 months (95% CI: 2.5-3.0); B: TLG assessment; median PFS of patients classified with progression 2.4 months (95% CI: 1.6-3.3) and non-progression 2.7 months (95% CI: 2.5-2.9); C: SULpeak assessment; median OS of patients classified with progression 2.3 months (95% CI: 1.5-3.1) and non-progression 8.0 months (95% CI: 5.1-11.0); D: TLG assessment; median OS of patients classified with progression 3.2 months (95% CI: 0.0-8.5) and non-progression 8.3 months (95% CI: 4.8-11.9). Differences between groups were calculated using the log-rank test.
